# Supplementary material for: Targeting the HIV Epidemic in South Africa: The Need for Testing and Linkage to Care in Emergency Departments
Source: PubMed Central journal article supplement — eClinicalMedicine. 2019 Aug 19;15:14–22. doi: 10.1016/j.eclinm.2019.08.007 (PMC6833451; doi:10.1016/j.eclinm.2019.08.007), 2019-08-19
Supplement: mmc1.pdf [file mmc1.pdf]

Supplemental Tables for Figure 2

Supplemental Table1a. HIV prevalence among 2,901 ED patients by age and sex

| Sex (n)        | Age Category (years) | N   | HIV prevalence (95% CI) |
|----------------|----------------------|-----|-------------------------|
| Males (n=1458) | <20                  | 67  | 4.4(1.4,13.1)           |
|                | 20-25                | 269 | 7.4(4.8,11.3)           |
|                | 26-35                | 449 | 24.1(20.3,28.2)         |
|                | 36-45                | 258 | 34.8(29.3,40.9)         |
|                | 46-55                | 186 | 25.8(20.0,32.6)         |
|                | 56+                  | 229 | 14.4(10.4,19.6)         |
|                | <20                  | 65  | 12.3(6.2,22.8)          |
|                | 20-25                | 273 | 33.3(28.0,39.2)         |
|                | 26-35                | 367 | 49.6(44.5,54.7)         |

|                     |       |     |                 |
|---------------------|-------|-----|-----------------|
| Females<br>(n=1443) | 36-45 | 242 | 55.4(49.0,61.5) |
|                     | 46-55 | 172 | 33.1(26.5,40.5) |
|                     | 56+   | 324 | 11.4(8.4,15.4)  |

Supplemental Table 1b. Prevalence of Newly diagnosed HIV infection among 811 HIV Positive ED patients by age and sex

| Sex<br>(n)         | Age<br>Category<br>(years) | N   | HIV<br>prevalence<br>(95% CI) |
|--------------------|----------------------------|-----|-------------------------------|
| Males<br>(n=302)   | <20                        | 3   | 66.7(9.5,97.5)                |
|                    | 20-25                      | 20  | 80(56.4,92.5)                 |
|                    | 26-35                      | 108 | 52.8(43.3,62.1)               |
|                    | 36-45                      | 90  | 32.2(23.3,42.6)               |
|                    | 46-55                      | 48  | 16.7(8.5,30.2)                |
|                    | 56+                        | 33  | 36.4(21.7,54.1)               |
| Females<br>(n=507) | <20                        | 8   | 62.5(26.4,88.5)               |
|                    | 20-25                      | 91  | 33(24.0,43.3)                 |
|                    | 26-35                      | 182 | 22.5(17.0,29.2)               |
|                    | 36-45                      | 134 | 14.9(9.8,22.1)                |
|                    | 46-55                      | 57  | 10.5(4.8,21.7)                |
|                    | 56+                        | 37  | 21.6(11.1,37.9)               |

Supplemental Table 1c. ARV treatment among 585 HIV positive ED patients by age and sex

| Sex<br>(n)       | Age<br>Category<br>(years) | N   | On ARV<br>(95%CI) |
|------------------|----------------------------|-----|-------------------|
| Males<br>(222)   | <20                        | 3   | 0(0,0)            |
|                  | 20-25                      | 14  | 7.1(0.9,39.1)     |
|                  | 26-35                      | 77  | 29.9(20.6,41.1)   |
|                  | 36-45                      | 66  | 56.1(43.8,67.6)   |
|                  | 46-55                      | 39  | 79.5(63.7,89.5)   |
|                  | 56+                        | 23  | 52.2(32.0,71.9)   |
| Females<br>(363) | <20                        | 6   | 33.3(7.2,76.4)    |
|                  | 20-25                      | 70  | 45.7(34.4,57.5)   |
|                  | 26-35                      | 128 | 53.9(45.2,62.4)   |
|                  | 36-45                      | 86  | 59.3(48.6,69.2)   |
|                  | 46-55                      | 46  | 80.4(66.3,89.6)   |
|                  | 56+                        | 27  | 77.8(58.1,89.8)   |

Supplemental Table 1d. Viral suppression among 609 HIV positive ED patients by age and sex

| Sex (n)         | Age Category (years) | N   | Virally suppressed (95%CI) |
|-----------------|----------------------|-----|----------------------------|
| Males (n=236)   | <20                  | 3   | 0(0,0)                     |
|                 | 20-25                | 16  | 0(0,0)                     |
|                 | 26-35                | 82  | 25.6(17.3,36.2)            |
|                 | 36-45                | 67  | 47.8(36.0,59.8)            |
|                 | 46-55                | 44  | 75(60.0,85.7)              |
|                 | 56+                  | 24  | 62.5(41.6,79.6)            |
| Females (n=373) | <20                  | 6   | 16.7(1.9,67.9)             |
|                 | 20-25                | 69  | 53.6(41.8,65.1)            |
|                 | 26-35                | 135 | 42.2(34.1,50.8)            |
|                 | 36-45                | 89  | 53.9(43.5,64.1)            |
|                 | 46-55                | 46  | 76.1(61.5,86.3)            |
|                 | 56+                  | 28  | 71.4(52.0,85.2)            |
